# Supplementary material for: Synthesis and Characterization of Bis[(R or S)-N-1-(X-C6H4)ethyl-2-oxo-1-naphthaldiminato-κ2N,O]-Λ/Δ-cobalt(II) (X = H, p-CH3O, p-Br) with Symmetry- and Distance-Dependent Vibrational Circular Dichroism Enhancement and Sign Inversion
Source: PubMed Central journal article supplement (PMC8456410; doi:10.1021/acs.inorgchem.1c01503), 2021-09-03
Supplement: ic1c01503_si_001.pdf [file ic1c01503_si_001.pdf]

## Supporting Information

Synthesis and characterization of *bis*[(*R* or *S*)-*N*-1-(*X*-C<sub>6</sub>H<sub>4</sub>)ethyl-2-oxo-1-naphthaldiminato- $\kappa^2N,O$ ]- $\Lambda/\Delta$ -cobalt(II) (*X* = H, *p*-CH<sub>3</sub>O, *p*-Br) with symmetry- and distance-dependent VCD enhancement and sign inversion

*Marcin Górecki,<sup>†,‡</sup> Mohammed Enamullah,<sup>⊥,\*</sup> Mohammad Ariful Islam,<sup>⊥</sup> Mohammad Khairul Islam,<sup>⊥</sup> Simon-Patrick Höfert,<sup>||</sup> Dennis Woschko,<sup>||</sup> Christoph Janiak,<sup>||,\*</sup> and Gennaro Pescitelli<sup>†,\*</sup>*

<sup>†</sup> Department of Chemistry and Industrial Chemistry, University of Pisa, Pisa, Italy. E-mail:

[gennaro.pescitelli@unipi.it](mailto:gennaro.pescitelli@unipi.it) (G.P.)

<sup>‡</sup> Institute of Organic Chemistry, Polish Academy of Sciences, Warsaw, Poland.

<sup>⊥</sup> Department of Chemistry, Jahangirnagar University, Dhaka, Bangladesh. E-mail:

[enamullah@juniv.edu](mailto:enamullah@juniv.edu) (M.E.)

<sup>||</sup> Institute of Inorganic Chemistry and Structural Chemistry, Heinrich-Heine-University of

Düsseldorf, Düsseldorf, Germany. E-mail: [janiak@uni-duesseldorf.de](mailto:janiak@uni-duesseldorf.de) (C.J.)

## Contents

|                                                                                                                                                                                                                                                                                         |     |
|-----------------------------------------------------------------------------------------------------------------------------------------------------------------------------------------------------------------------------------------------------------------------------------------|-----|
| <b>Table S1.</b> Crystal data and structure refinements for Co(II)-Schiff bases complexes. ....                                                                                                                                                                                         | S3  |
| <b>Table S2.</b> Selected bond lengths (Å) and angles (°) in $\Delta$ -Co-S-L1 [(S)-1] and $\Lambda$ -Co-R-L1 [(S)-1].                                                                                                                                                                  | S4  |
| <b>Table S3.</b> Selected bond lengths (Å) and angles (°) in $\Lambda$ -Co-R-L2 [(R)-2] and $\Delta$ -Co-S-L3 [(S)-3].                                                                                                                                                                  | S4  |
| <b>Table S4.</b> Ligand chirality and substituents leading to chirality induction at-metal in <i>bis</i> [(R- or S)-N-1-( <i>p</i> -X-C <sub>6</sub> H <sub>4</sub> )ethyl-salicylaldiminato-k <sup>2</sup> N,O]- $\Lambda$ - or $\Delta$ -M(II) in the solid state and in solution.... | S5  |
| <b>Figure S1.</b> EI-mass spectra for (a) Co-R-L1 [(S)-1] and Co-S-L1 [(S)-1]; (b) Co-R-L2 [(R)-2] and Co-S-L2 [(R)-2]; (c) Co-R-L3 [(R)-3] and Co-S-L3 [(S)-3] .....                                                                                                                   | S6  |
| <b>Figure S2.</b> X-ray molecular structures of $\Delta$ -Co-S-L1 [(S)-1].....                                                                                                                                                                                                          | S9  |
| <b>Figure S3.</b> X-ray molecular structures of $\Lambda$ -Co-R-L1 [(R)-1] .....                                                                                                                                                                                                        | S10 |
| <b>Figure S4.</b> X-ray molecular structure in $\Lambda$ -Co-R-L2 [(R)-2] .....                                                                                                                                                                                                         | S11 |
| <b>Figure S5.</b> X-ray molecular structures of $\Delta$ -Co-S-L3 [(S)-3].....                                                                                                                                                                                                          | S12 |
| <b>Figure S6.</b> Differential Scanning Calorimetry (DSC) curves for complexes (R)-1, (S)-1, (R)-2, and (S)-2, and ligand HL2.....                                                                                                                                                      | S13 |
| <b>Figure S7.</b> VT-ECD spectra of (S)-1 in CHCl <sub>3</sub> and data fitting.....                                                                                                                                                                                                    | S14 |
| <b>Figure S8.</b> Geometries and relative energies calculated for (R)-1 with DFT.....                                                                                                                                                                                                   | S15 |
| <b>Figure S9.</b> Molecular overlay between the X-ray structure of (R)-1 and the lowest-energy DFT-optimized structure.....                                                                                                                                                             | S16 |
| <b>Figure S10.</b> Comparison of experimental and B3LYP-calculated CD superspectra of (R)-1 .....                                                                                                                                                                                       | S17 |
| <b>Figure S11.</b> Kohn-Sham MO plots and energies calculated for (R)-1 .....                                                                                                                                                                                                           | S18 |
| <b>Figure S12.</b> Transition energies, symmetries and density plots of (R)-1.....                                                                                                                                                                                                      | S19 |
| <b>Figure S13.</b> Comparison of calculated ECD spectra for $\Lambda$ -(R)-1 and $\Delta$ -(R)-1 .....                                                                                                                                                                                  | S20 |
| <b>Figure S14.</b> Atom displacements for B-symmetry normal modes 182 and 186 .....                                                                                                                                                                                                     | S21 |
| References for the Supporting Information .....                                                                                                                                                                                                                                         | S22 |

**Table S1.** Crystal data and structure refinements for Co(II)-Schiff bases complexes.

|                                                                                                   | $\Lambda$ -Co- <i>R</i> -L1                                     | $\Delta$ -Co- <i>S</i> -L1                                      | $\Lambda$ -Co- <i>R</i> -L2                                     | $\Delta$ -Co- <i>S</i> -L3                                                      |
|---------------------------------------------------------------------------------------------------|-----------------------------------------------------------------|-----------------------------------------------------------------|-----------------------------------------------------------------|---------------------------------------------------------------------------------|
|                                                                                                   | [( <i>R</i> )- <b>1</b> ]                                       | [( <i>S</i> )- <b>1</b> ]                                       | [( <i>R</i> )- <b>2</b> ]                                       | [( <i>S</i> )- <b>3</b> ]                                                       |
| Empirical formula                                                                                 | C <sub>38</sub> H <sub>32</sub> CoN <sub>2</sub> O <sub>2</sub> | C <sub>38</sub> H <sub>32</sub> CoN <sub>2</sub> O <sub>2</sub> | C <sub>40</sub> H <sub>36</sub> CoN <sub>2</sub> O <sub>4</sub> | C <sub>38</sub> H <sub>30</sub> Br <sub>2</sub> CoN <sub>2</sub> O <sub>2</sub> |
| <i>M</i> (g mol <sup>-1</sup> )                                                                   | 607.58                                                          | 607.58                                                          | 667.64                                                          | 7.65.39                                                                         |
| Temperature (K)                                                                                   | 140                                                             | 140                                                             | 140                                                             | 140                                                                             |
| Crystal size                                                                                      | 0.372 × 0.211 × 0.166                                           | 0.125 × 0.125 × 0.05                                            | 0.06 × 0.02 × 0.01                                              | 0.312 × 0.254 × 0.214                                                           |
| Crystal system                                                                                    | Triclinic                                                       | Triclinic                                                       | Monoclinic                                                      | Trigonal                                                                        |
| Space group                                                                                       | P1                                                              | P1                                                              | P2 <sub>1</sub>                                                 | P3 <sub>2</sub> 21                                                              |
| <i>a</i> (Å)                                                                                      | 9.4050(6)                                                       | 9.4128(8)                                                       | 8.8350 (6)                                                      | 10.1323(4)                                                                      |
| <i>b</i> (Å)                                                                                      | 9.4342(6)                                                       | 9.4440(8)                                                       | 19.1145 (11)                                                    | 10.1323(4)                                                                      |
| <i>c</i> (Å)                                                                                      | 18.7375(11)                                                     | 18.7617(15)                                                     | 10.2002 (6)                                                     | 54.390(2)                                                                       |
| $\alpha$ (°)                                                                                      | 80.145(4)                                                       | 80.190(4)                                                       | 90                                                              | 90                                                                              |
| $\beta$ (°)                                                                                       | 88.372(4)                                                       | 88.490(4)                                                       | 96.594 (3)                                                      | 90                                                                              |
| $\gamma$ (°)                                                                                      | 64.184(3)                                                       | 64.170(3)                                                       | 90                                                              | 120                                                                             |
| <i>V</i> (Å <sup>3</sup> )                                                                        | 1472.55(16)                                                     | 1477.1(2)                                                       | 1711.18 (18)                                                    | 4835.8(4)                                                                       |
| <i>Z</i> / <i>D</i> <sub>calc.</sub> (g cm <sup>-3</sup> )                                        | 2/1.370                                                         | 2/1.366                                                         | 2/1.296                                                         | 6/1.577                                                                         |
| $\mu$ (mm <sup>-1</sup> )                                                                         | 0.621                                                           | 0.619                                                           | 0.545                                                           | 3.049                                                                           |
| F(000)                                                                                            | 634                                                             | 634                                                             | 698                                                             | 2310                                                                            |
| Max./min. transmission                                                                            | 1.000/0.9195                                                    | 1.000/0.947                                                     | 1.000/0.915                                                     | 1.000/0.807                                                                     |
| $\theta$ range (°)                                                                                | 2.209-25.599                                                    | 2.206-27.769                                                    | 2.010-27.599                                                    | 2.439-26.855                                                                    |
| <i>h</i> ; <i>k</i> ; <i>l</i> ranges                                                             | ±11; ±11; ±22                                                   | ±12; ±12; ±24                                                   | -11, 9; ±24; -12, 13                                            | -11, 12; -12, 10; ±69                                                           |
| Reflections collected                                                                             | 20958                                                           | 57134                                                           | 27042                                                           | 24760                                                                           |
| Independent reflect. ( <i>R</i> <sub>int</sub> )                                                  | 10575 (0.027)                                                   | 13750 (0.030)                                                   | 7660 (0.035)                                                    | 6801 (0.049)                                                                    |
| Data completeness (%)                                                                             | 95.0                                                            | 99.2                                                            | 97.9                                                            | 99.2                                                                            |
| Data/restraints/parameters                                                                        | 10575/3/778                                                     | 13750/3/774                                                     | 7660/1/428                                                      | 6801/0/409                                                                      |
| Goodness-of-fit on <i>F</i> <sup>2a</sup>                                                         | 1.022                                                           | 1.031                                                           | 0.795                                                           | 1.090                                                                           |
| <i>R</i> <sub>1</sub> / <i>wR</i> <sub>2</sub> [ <i>I</i> > 2 $\sigma$ ( <i>I</i> )] <sup>b</sup> | 0.0347/0.0803                                                   | 0.0286/0.0703                                                   | 0.0375/0.1005                                                   | 0.0468/0.1065                                                                   |
| <i>R</i> <sub>1</sub> / <i>wR</i> <sub>2</sub> (all data) <sup>b</sup>                            | 0.0395/0.0833                                                   | 0.0318/0.0718                                                   | 0.0516/0.1134                                                   | 0.0544/0.1109                                                                   |
| Max./min. $\Delta\rho$ (e. Å <sup>-3</sup> ) <sup>c</sup>                                         | 0.40/-0.28                                                      | 0.598/-0.222                                                    | 0.264/-0.292                                                    | 0.649/-0.395                                                                    |
| Flack parameter <sup>d</sup>                                                                      | 0.005(6)                                                        | 0.007(9)                                                        | 0.014(5)                                                        | 0.050(6)                                                                        |
| CCDC number                                                                                       | 2083905                                                         | 2083906                                                         | 2083907                                                         | 2083908                                                                         |

<sup>a</sup> Goodness-of-fit =  $[\sum[w(F_o^2 - F_c^2)^2]/(n - p)]^{1/2}$ ; <sup>b</sup>  $R_1 = [\sum(|F_o| - |F_c|)/\sum F_o]$ ;  $wR_2 = [\sum[w(F_o^2 - F_c^2)^2]/\sum[w(F_o^2)^2]]^{1/2}$ ;

<sup>c</sup> Largest difference peak and hole; <sup>d</sup> Absolute structure (Flack) parameter.<sup>1-4</sup>

**Table S2.** Selected bond lengths (Å) and angles (°) in  $\Delta$ -Co-*S*-L1 [(*S*)-1] (A and B)<sup>a</sup> and  $\Lambda$ -Co-*R*-L1 [(*R*)-1] (A and B).<sup>a</sup>

| $\Delta$ -Co- <i>S</i> -L1 (A) |                   | $\Delta$ -Co- <i>S</i> -L1 (B) |                   | $\Lambda$ -Co- <i>R</i> -L1 (A) |                   | $\Lambda$ -Co- <i>R</i> -L1 (B) |                   |
|--------------------------------|-------------------|--------------------------------|-------------------|---------------------------------|-------------------|---------------------------------|-------------------|
| Co1-O1/O2                      | 1.916(2)/1.917(2) | Co2-O3/O4                      | 1.910(2)/1.913(2) | Co1-O1/O2                       | 1.912(3)/1.916(3) | Co2-O3/O4                       | 1.907(3)/1.912(3) |
| Co1-N1/N2                      | 1.976(3)/1.971(2) | Co2-N3/N4                      | 1.969(3)/1.972(2) | Co1-N1/N2                       | 1.973(3)/1.977(3) | Co2-N3/N4                       | 1.967(4)/1.967(3) |
| O1-C1/O2-C20                   | 1.297(3)/1.309(3) | O3-C39/O4-C58                  | 1.294(3)/1.302(3) | O1-C1/O2-C20                    | 1.294(5)/1.289(5) | O3-C39/O4-C58                   | 1.293(5)/1.303(4) |
| C11-N1/C30-N2                  | 1.299(3)/1.296(4) | C49-N3/C68-N4                  | 1.288(3)/1.294(3) | C11-N1/C30-N2                   | 1.286(5)/1.286(5) | C49-N3/C68-N4                   | 1.285(5)/1.301(4) |
| O1-Co1-O2                      | 109.7(1)          | O3-Co2-O4                      | 110.9(1)          | O1-Co1-O2                       | 109.5(1)          | O3-Co2-O4                       | 110.7(1)          |
| N1-Co1-N2                      | 123.9(1)          | N3-Co2-N4                      | 126.5(1)          | N1-Co1-N2                       | 124.1(1)          | N3-Co2-N4                       | 126.5(1)          |
| O1-Co1-N1                      | 94.1(1)           | O3-Co2-N3                      | 94.8(1)           | O1-Co1-N1                       | 94.0(1)           | O3-Co2-N3                       | 94.8(1)           |
| O2-Co1-N2                      | 94.2(1)           | O4-Co2-N4                      | 94.0(1)           | O2-Co1-N2                       | 93.8(1)           | O4-Co2-N4                       | 94.1(1)           |
| O1-Co1-N2                      | 118.7(1)          | O3-Co2-N4                      | 113.9(1)          | O1-Co1-N2                       | 117.5(1)          | O3-Co2-N4                       | 113.7(1)          |
| O2-Co1-N1                      | 117.3(1)          | O4-Co2-N3                      | 117.4(1)          | O2-Co1-N1                       | 118.9(1)          | O4-Co2-N3                       | 117.6(1)          |

<sup>a</sup> Two symmetry-independent molecules.

**Table S3.** Selected bond lengths (Å) and angles (°) in  $\Lambda$ -Co-*R*-L2 [(*R*)-2] and  $\Delta$ -Co-*S*-L3 [(*S*)-3] (A and B).<sup>a</sup>

| $\Lambda$ -Co- <i>R</i> -L2 |                   | $\Delta$ -Co- <i>S</i> -L3 (A) |          | $\Delta$ -Co- <i>S</i> -L3 (B) |          |
|-----------------------------|-------------------|--------------------------------|----------|--------------------------------|----------|
| Co1-O1/O3                   | 1.924(3)/1.930(3) | Co1-O1                         | 1.922(5) | Co2-O2                         | 1.918(4) |
| Co1-N1/N2                   | 1.982(3)/1.984(3) | Co1-N1                         | 1.970(5) | Co2-N2                         | 1.974(4) |
| O1-C7/O3-C23                | 1.306(5)/1.286(5) | O1-C1                          | 1.303(9) | O2-C20                         | 1.305(8) |
| C1-N1/C21-N2                | 1.295(5)/1.290(5) | C11-N1                         | 1.297(7) | C30-N2                         | 1.286(7) |
| O1-Co1-O3                   | 116.8(2)          | C16-Br1                        | 1.895(6) | C35-Br2                        | 1.894(6) |
| N1-Co1-N2                   | 130.4(2)          | O1-Co1-O1 <sup>ii</sup>        | 117.8(3) | O2-Co2-O2 <sup>i</sup>         | 118.4(3) |
| O1-Co1-N1                   | 91.5(2)           | N1-Co1-N1 <sup>ii</sup>        | 125.7(3) | N2-Co2-N2 <sup>i</sup>         | 126.9(3) |
| O3-Co1-N2                   | 93.4(2)           | O1-Co1-N1                      | 92.6(2)  | O2-Co2-N2                      | 93.5(2)  |
| O1-Co1-N2                   | 111.9(2)          | O1 <sup>ii</sup> -Co1-N1       | 115.1(8) | O2 <sup>i</sup> -Co2-N2        | 113.3(6) |

<sup>a</sup> Two symmetry-independent molecules in  $\Delta$ -Co-*S*-L3 [(*S*)-3], each with the Co atom on a special position. Symmetry transformations used to generate equivalent atoms: ii =  $-x+2, -x+y+1, -z+2/3$  (A); y, x,  $-z+1$  (B).

**Table S4.** Ligand chirality and substituents leading to chirality induction at-metal in *bis*[(*R*- or *S*)-*N*-1-(*p*-*X*-C<sub>6</sub>H<sub>4</sub>)ethyl-salicylaldiminato-κ<sup>2</sup>*N,O*]-Λ- or Δ-*M*(II) in the solid state and in solution.

| Complexes #<br>[ <i>M</i> ( <i>R</i> or <i>S</i> -L) <sub>2</sub> ] | Ligand substituents<br>( <i>X</i> )        | Ligand chirality<br>→ induction at-<br>metal at solid-<br>state | Ligand chirality<br>→ induction at-<br>metal in<br>solution | Ref. |
|---------------------------------------------------------------------|--------------------------------------------|-----------------------------------------------------------------|-------------------------------------------------------------|------|
| M = Co                                                              | H                                          | <i>S</i> → Δ, <i>R</i> → Λ                                      | <i>S</i> → Δ, <i>R</i> → Λ                                  | 5    |
|                                                                     | <i>p</i> -CH <sub>3</sub> O                | <i>S</i> → Δ, <i>R</i> → Λ                                      | <i>S</i> → Δ, <i>R</i> → Λ                                  |      |
|                                                                     | <i>p</i> -Cl or -Br                        | <i>S</i> → Δ, <i>R</i> → Λ                                      | <i>S</i> → Δ, <i>R</i> → Λ                                  |      |
| M = Zn                                                              | H                                          | <i>S</i> → Δ, <i>R</i> → Λ                                      | <i>S</i> → Δ, <i>R</i> → Λ                                  | 6    |
|                                                                     | <i>p</i> -CH <sub>3</sub> O                | <i>S</i> → Δ, <i>R</i> → Λ                                      | <i>S</i> → Δ, <i>R</i> → Λ                                  |      |
|                                                                     | <i>p</i> -Cl or -Br                        | <i>S</i> → Δ, <i>R</i> → Λ                                      | <i>S</i> → Δ, <i>R</i> → Λ                                  |      |
| M = Cu                                                              | H <sup>a</sup>                             | <i>S</i> → Λ, <i>R</i> → Δ                                      | <i>S</i> → Λ, <i>R</i> → Δ                                  | 7    |
|                                                                     | <i>p</i> -CH <sub>3</sub> O <sup>a,b</sup> | <i>S</i> → Δ, <i>R</i> → Λ                                      | <i>S</i> → Λ, <i>R</i> → Δ                                  |      |
|                                                                     | <i>p</i> -Cl or -Br <sup>a</sup>           | <i>S</i> → Λ, <i>R</i> → Δ                                      | <i>S</i> → Λ, <i>R</i> → Δ                                  |      |
| M = Ni <sup>c</sup>                                                 | <i>p</i> -CH <sub>3</sub> O                | <i>S</i> → Δ, <i>R</i> → Λ                                      | <i>S</i> → Λ, <i>R</i> → Δ                                  | 8    |
|                                                                     | <i>p</i> -Cl                               | <i>S</i> → Λ, <i>R</i> → Δ                                      | <i>S</i> → Λ, <i>R</i> → Δ                                  |      |

<sup>a</sup> Opposite chirality induction at-metal with *X* = H, *p*-Cl or -Br in comparison to the homoleptic Co, Ni and Zn-complexes at solid-state and in solution, while similar induction with *X* = *p*-CH<sub>3</sub>O at solid-state and opposite induction in solution.

<sup>b</sup> Solid vs. solution studies reveal chirality inversion at-metal.

<sup>c</sup> Dinuclear μ-aqua-*tetrakis*[(*R* or *S*)-*N*-1-(Ar)ethyl-salicylaldiminato]-di-Λ- or -Δ-nickel(II).

511-055 #195 RT: 4.97 AV: 1 NL: 1.75E6  
T: + c EI [45.00-900.03]

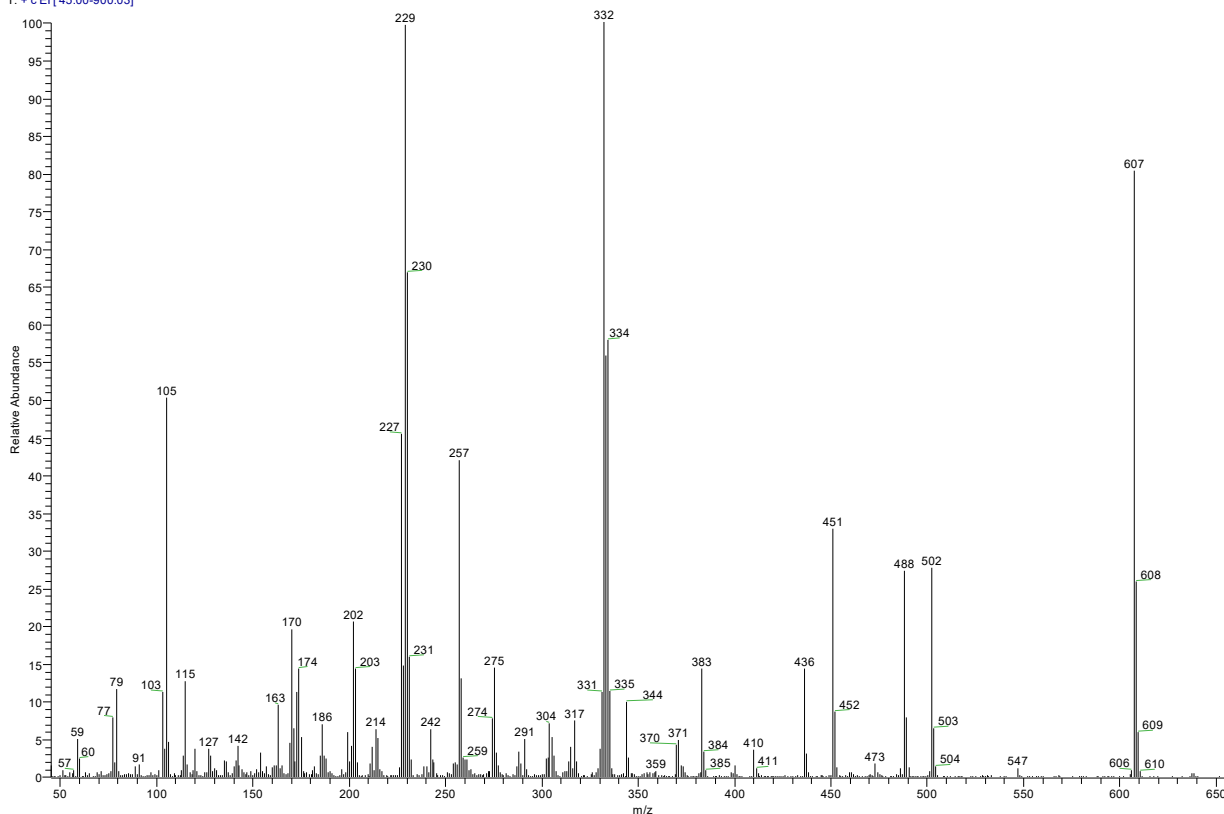

571-053 #67 RT: 1.74 AV: 1 NL: 7.64E6  
T: + c EI ms [34.96-999.96]

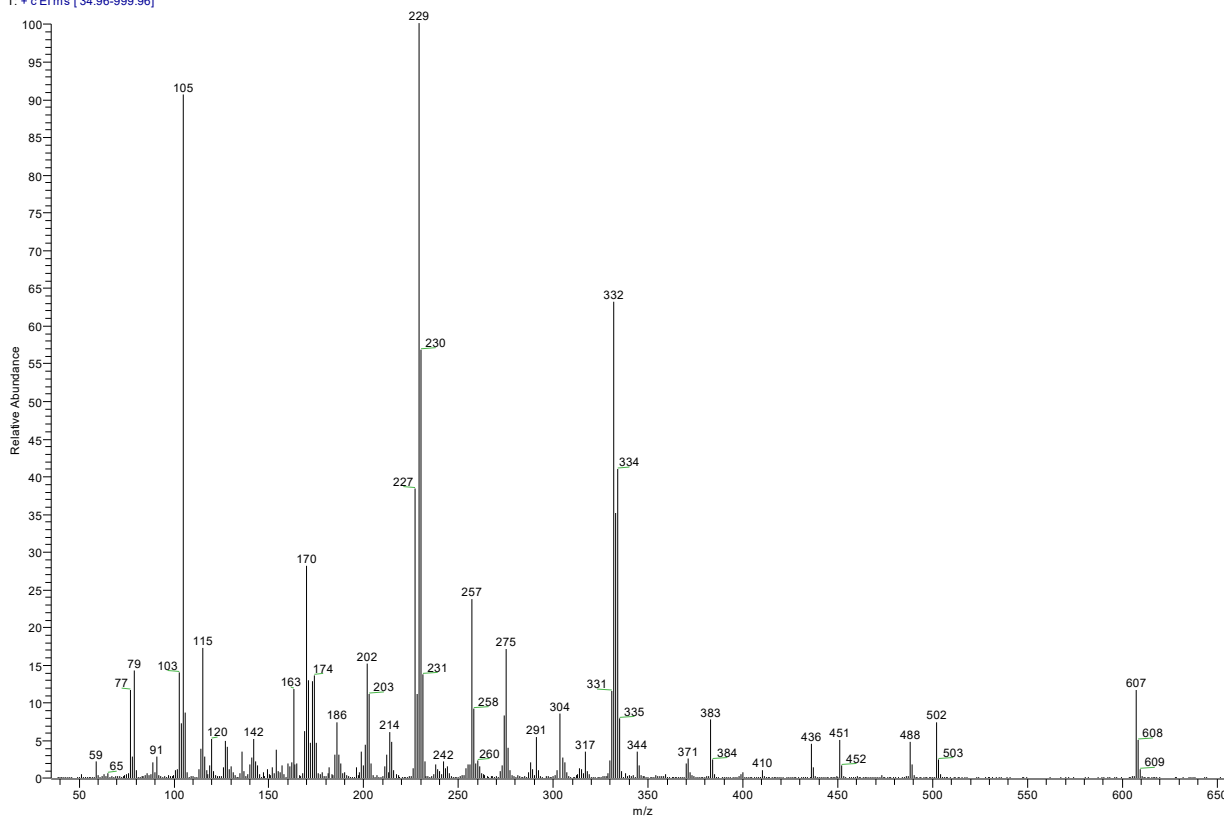

Figure S1. (a) EI-mass spectra for Co-R-L1 [(R)-1] (top) and Co-S-L1 [(S)-1] (bottom).

571-048 #91 RT: 2.34 AV: 1 NL: 2.59E7  
T: + c EI ms [34.96-999.96]

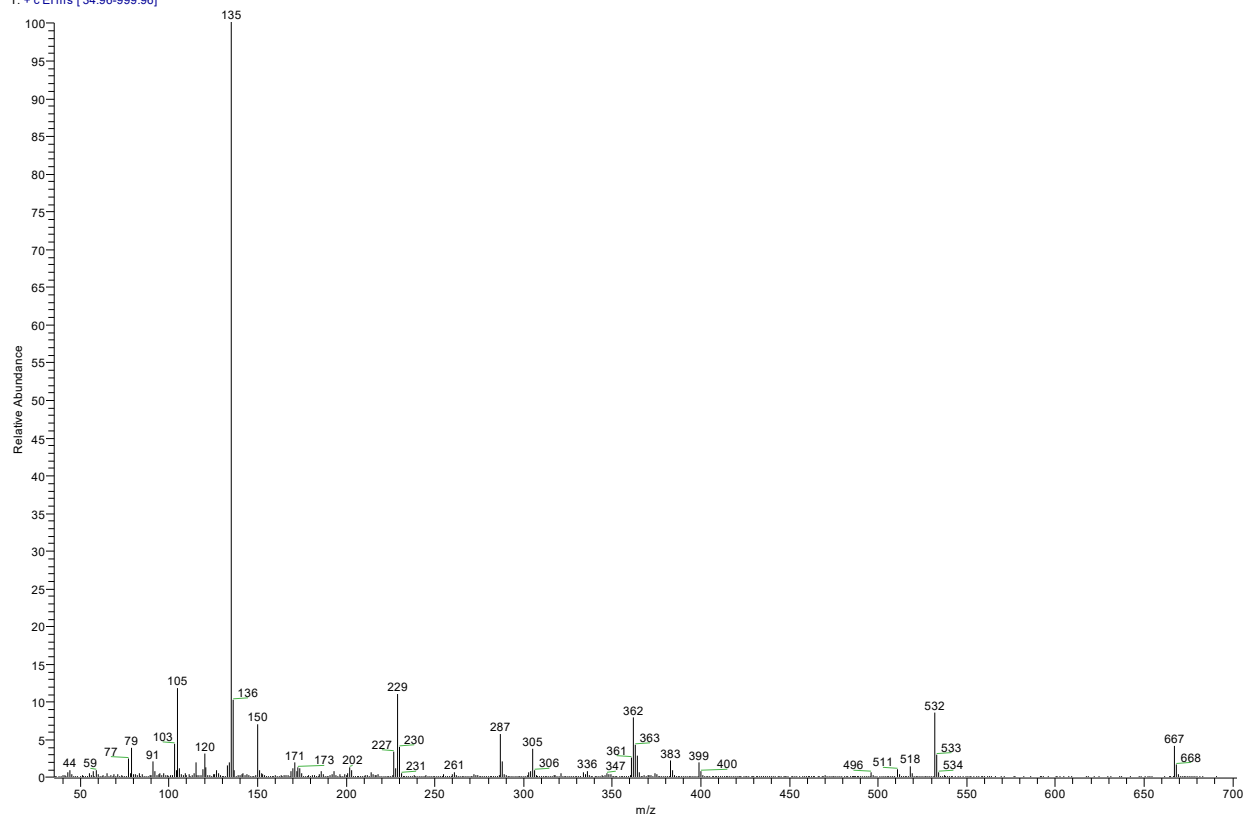

511-053 #239 RT: 6.07 AV: 1 NL: 1.64E6  
T: + c EI [45.00-900.03]

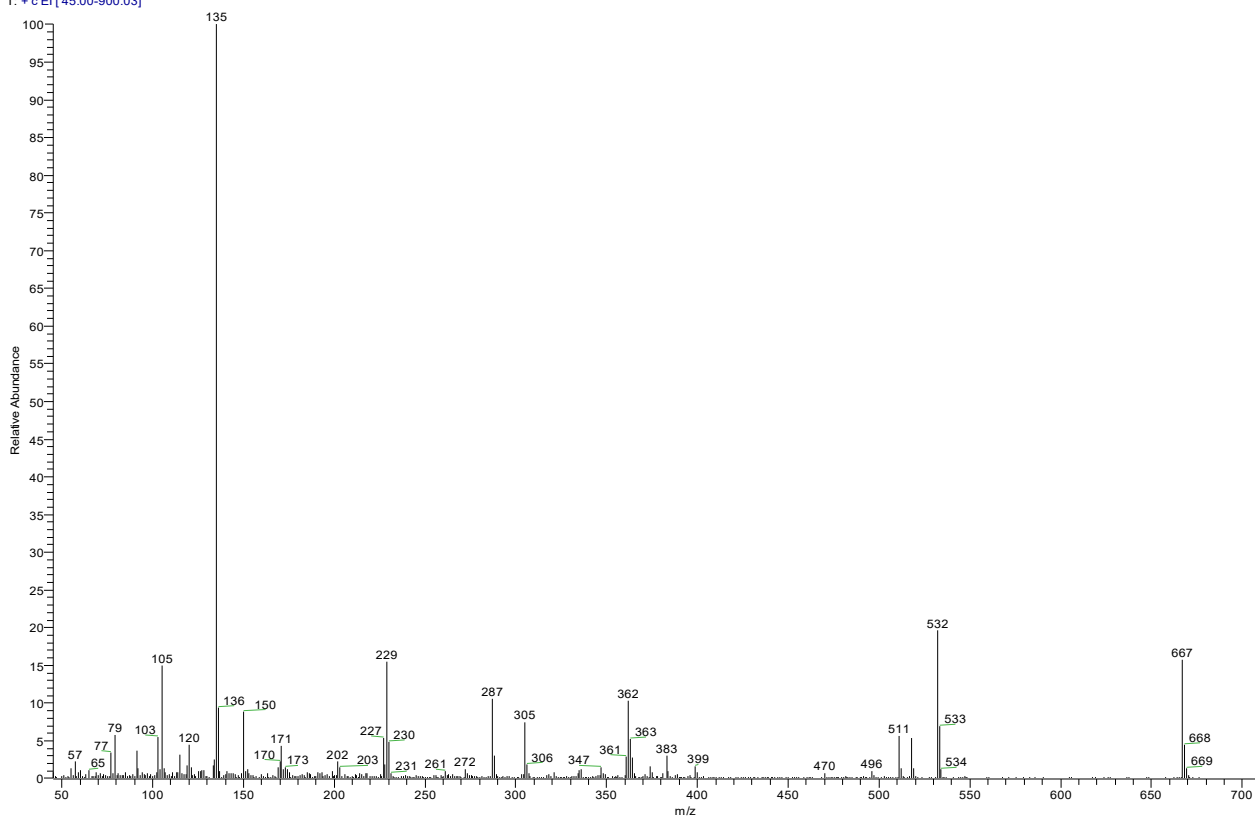

**Figure S1.** (b) EI-mass spectra for Co-R-L2 [(R)-2] (top) and Co-S-L2 [(S)-2] (bottom).

571-049 #77 RT: 1.99 AV: 1 NL: 7.46E6  
T: + c EI ms [34.96-999.96]

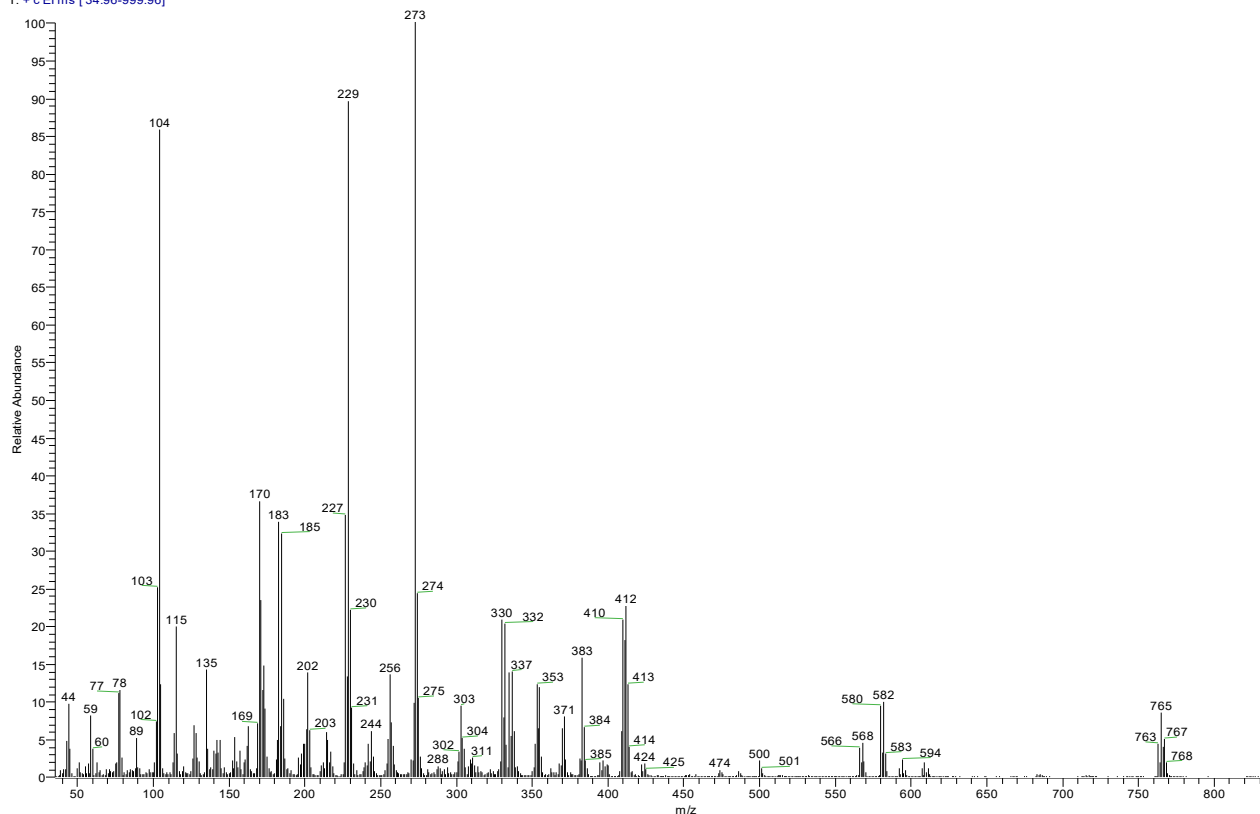

511-054 #105 RT: 2.70 AV: 1 NL: 1.58E6  
T: + c EI [45.00-900.03]

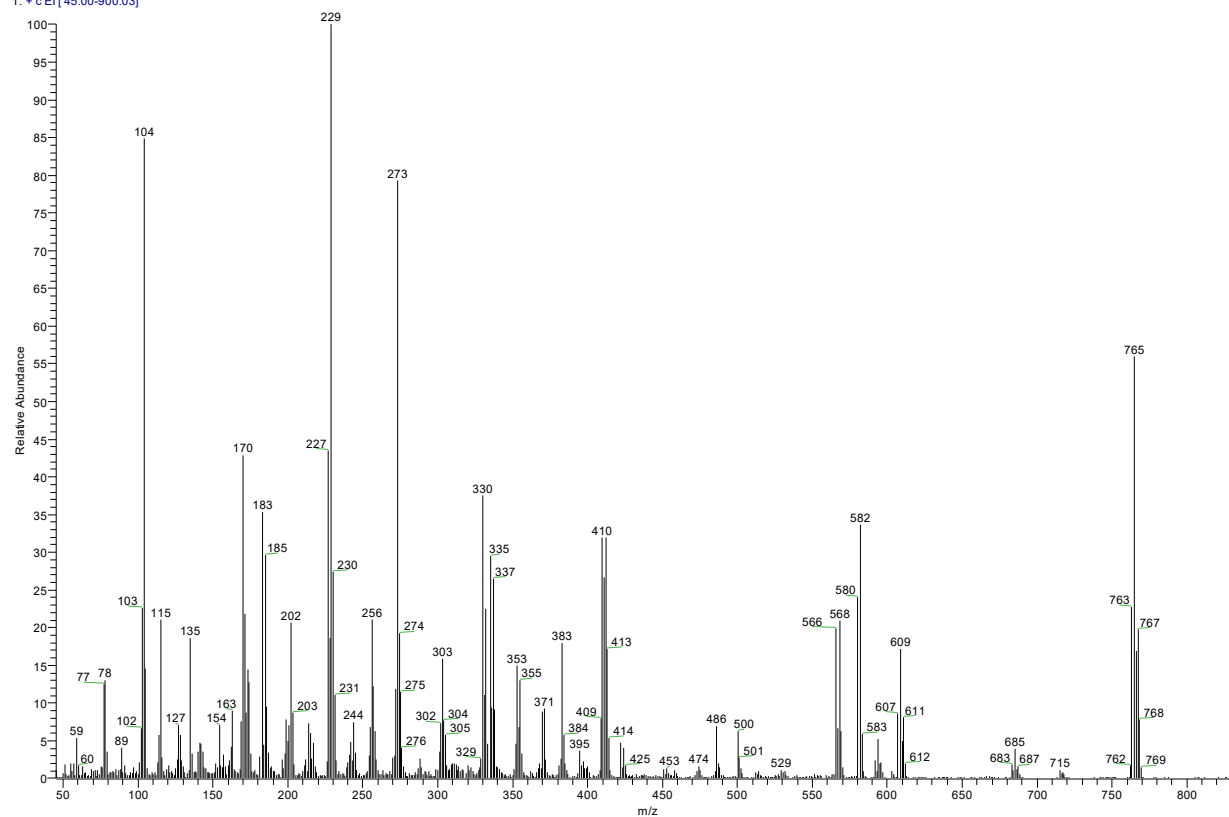

Figure S1. (c) EI-mass spectra for Co-R-L3 [(R)-3] (top) and Co-S-L2 [(S)-3] (bottom).



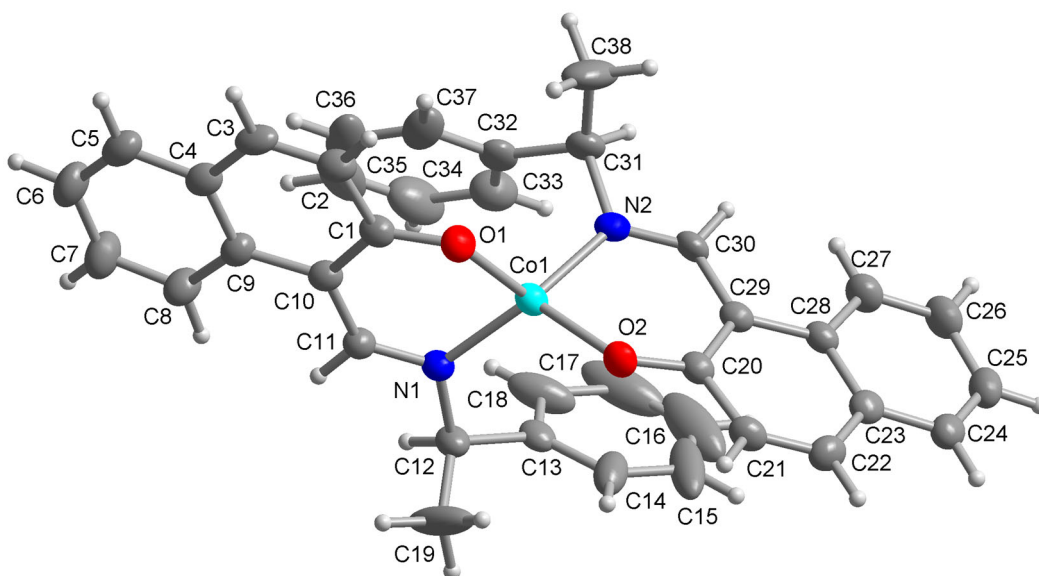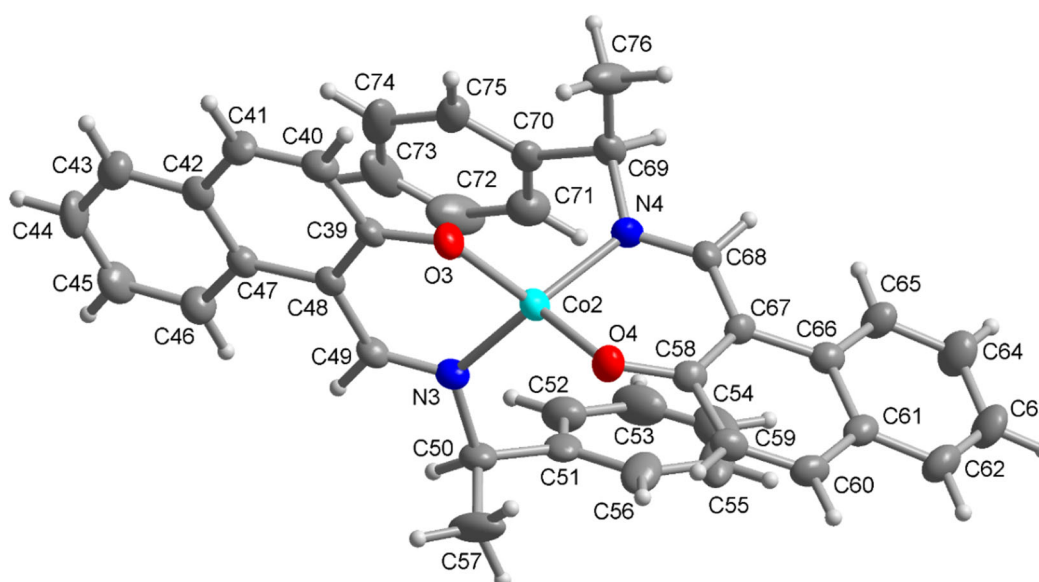

**Figure S2.** X-ray molecular structures of the symmetry-independent molecules in  $\Delta$ -Co-S-L1 [(S)-1] with full atom numbering scheme. Thermal ellipsoids at 50% (H atoms at arbitrary radii).

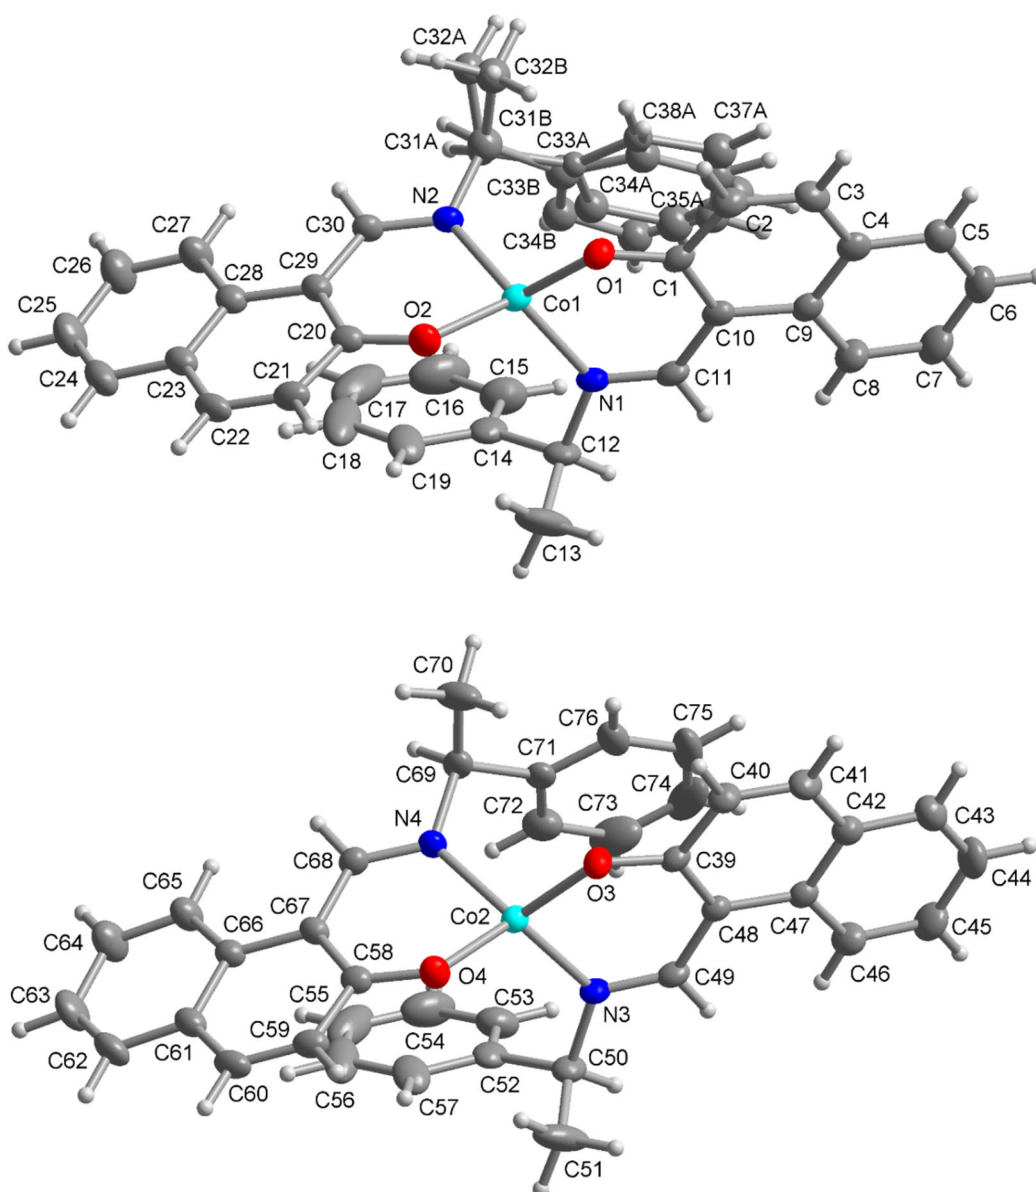

**Figure S3.** X-ray molecular structures of the symmetry-independent molecules in  $\Lambda$ -Co-R-L1 [(*R*)-1] with full atom numbering scheme. Also shown is the disorder in one of the phenylethyl groups in molecule Co1 for which the atoms could only be refined isotropically. Thermal ellipsoids at 50% (H atoms at arbitrary radii).

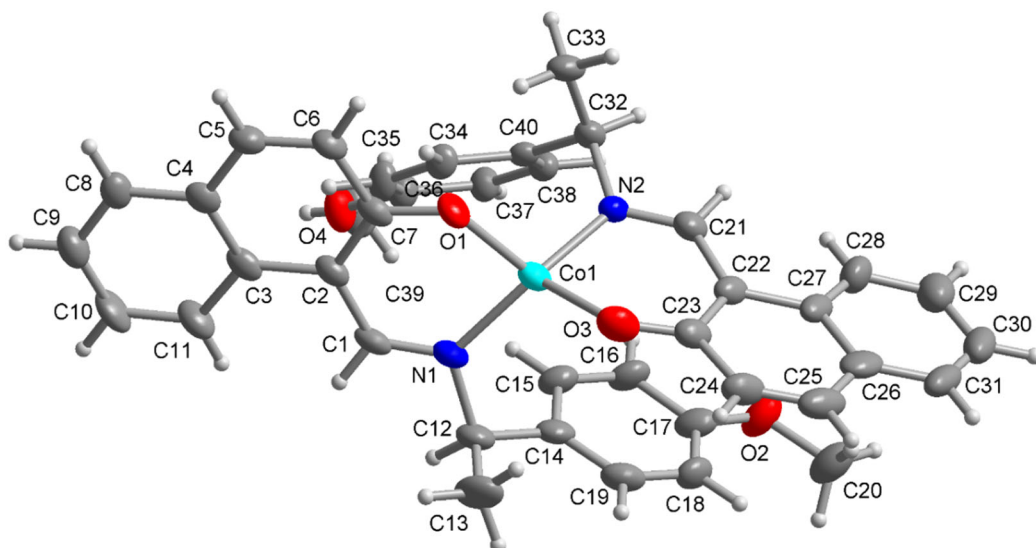

**Figure S4.** X-ray molecular structure in  $\Lambda$ -Co-R-L2 [(R)-2] with full atom numbering scheme. Thermal ellipsoids at 50% (H atoms at arbitrary radii).

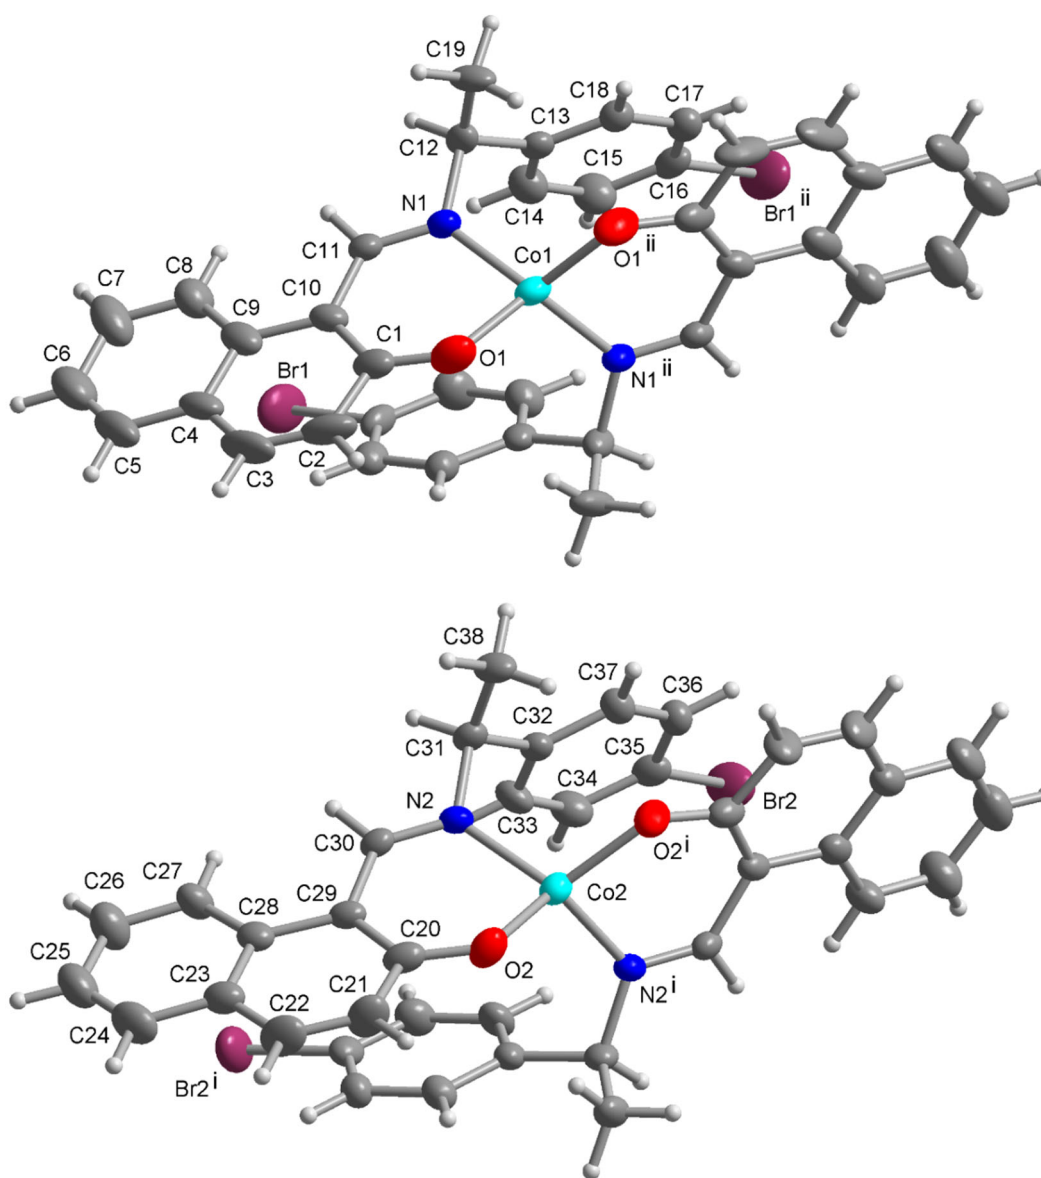

**Figure S5.** X-ray molecular structures of the symmetry-independent molecules in  $\Delta$ -Co-S-L3 [(S)-1] with full atom numbering scheme. Thermal ellipsoids at 50% (H atoms at arbitrary radii). Symmetry labels:  $i = y, x, 1-z$ ;  $ii = 2-x, 1-x+y, 2/3-z$ .

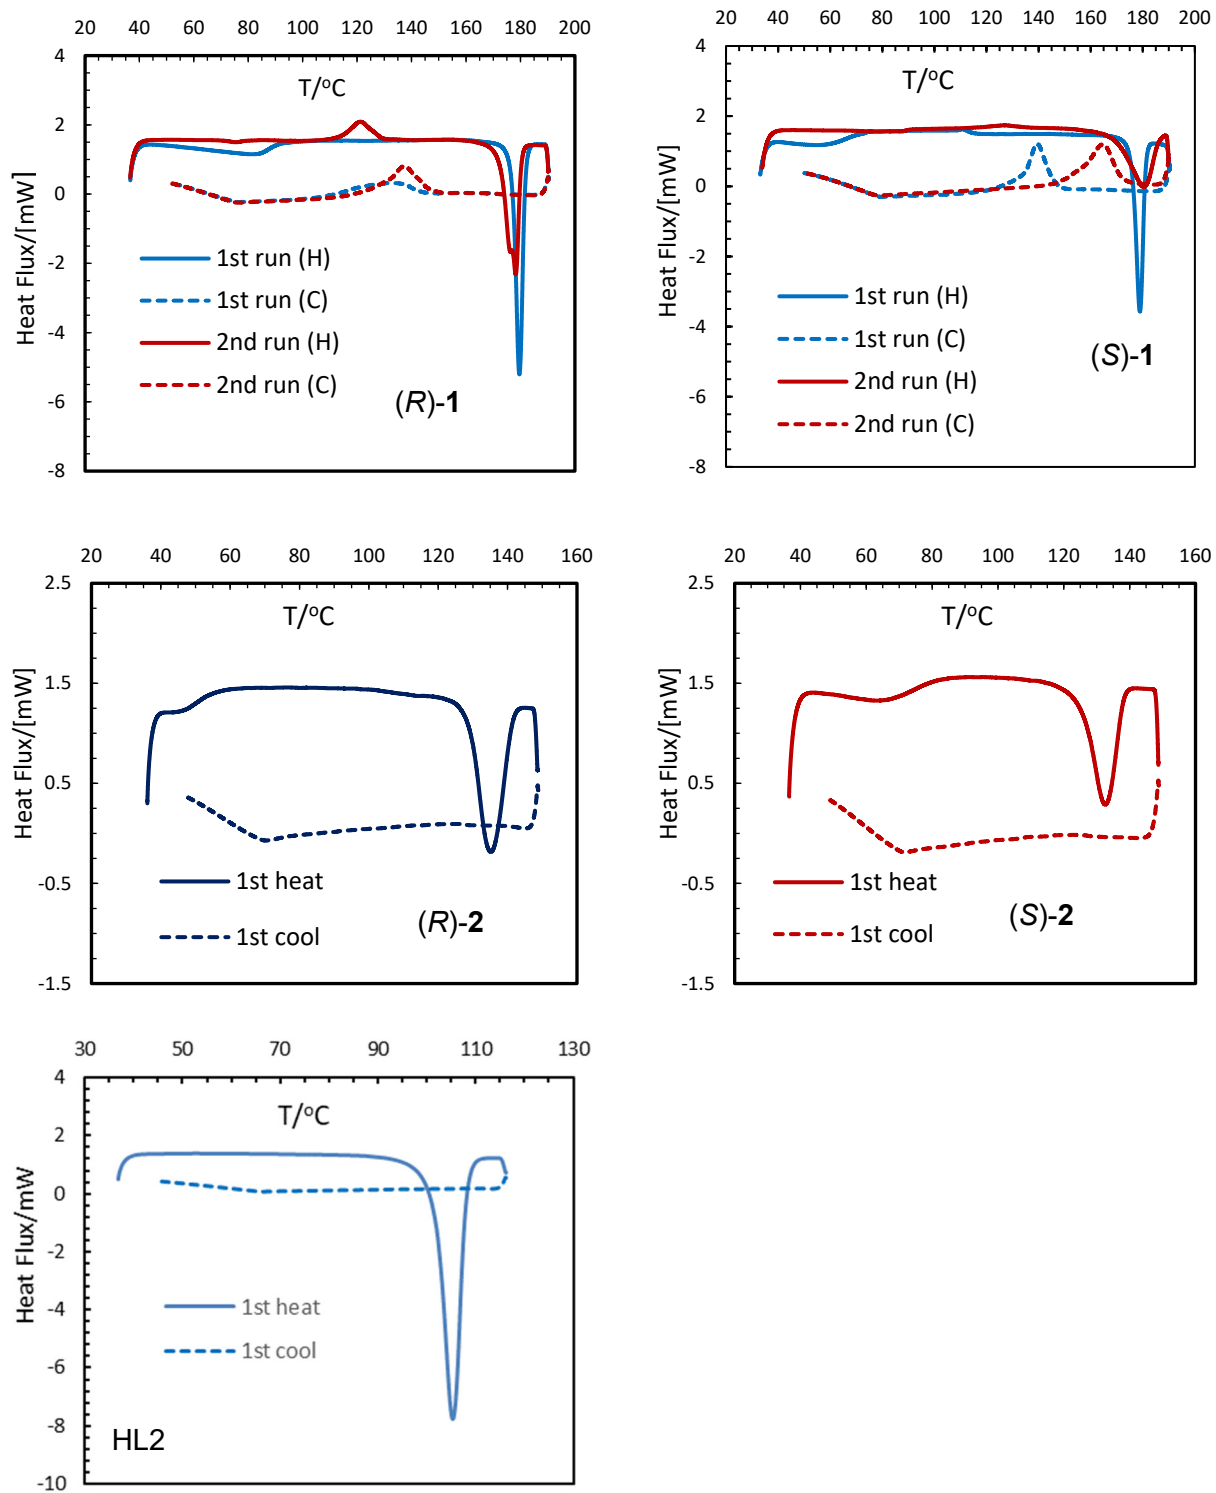

**Figure S6.** Differential Scanning Calorimetry (DSC) curves for complexes (R)-1, (S)-1, (R)-2, and (S)-2, and for ligand HL2 (H/C = heating/cooling).

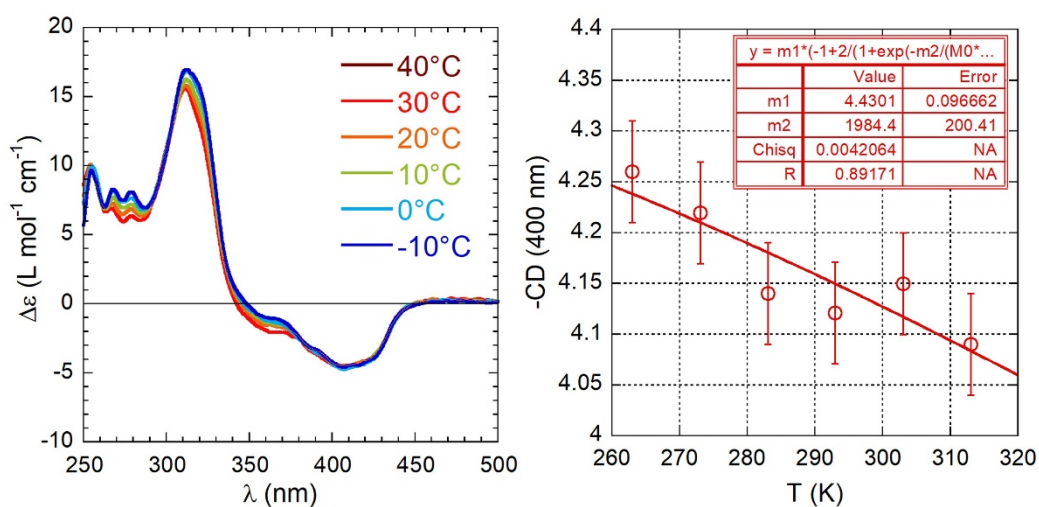

**Figure S7.** Left: variable-temperature ECD spectra of (*S*)-**1** in CHCl<sub>3</sub>. Right: fitting of ECD value at 400 nm according to the equation describing a single apparent equilibrium between two species:

$$Y = m_1 \left( \frac{2}{1 + \exp(-m_2/RT)} - 1 \right)$$

where parameter  $m_1$  is the molar ECD of the major species at 400 nm ( $\Delta$  isomer), considered to be equal in intensity and opposite in sign of the ECD of the minor species ( $\Lambda$  isomer), and parameter  $m_2$  is the apparent  $\Delta G^\circ$  of the process in cal/mol (assumed to be temperature-independent over the observed range).

|                                  |                                  |                                  |                                  |
|----------------------------------|----------------------------------|----------------------------------|----------------------------------|
|                                  |                                  |                                  |                                  |
| Δ-( <i>R</i> )<br>lowest energy  | Δ-( <i>R</i> )<br>+1.52 kcal/mol | Δ-( <i>R</i> )<br>+4.30 kcal/mol | Δ-( <i>R</i> )<br>+7.17 kcal/mol |
|                                  |                                  |                                  |                                  |
| Δ-( <i>R</i> )<br>+3.71 kcal/mol | Δ-( <i>R</i> )<br>+3.91 kcal/mol | Δ-( <i>R</i> )<br>+4.07 kcal/mol | Δ-( <i>R</i> )<br>+4.40 kcal/mol |
|                                  |                                  |                                  |                                  |
| Δ-( <i>R</i> )<br>+4.67 kcal/mol | Δ-( <i>R</i> )<br>+5.03 kcal/mol | Δ-( <i>R</i> )<br>+5.40 kcal/mol | Δ-( <i>R</i> )<br>+5.66 kcal/mol |

**Figure S8.** Geometries and relative energies calculated for (*R*)-1 at B3LYP-D3/def2-TZVP/PCM //B3LYP/def2-SVP level with PCM for chloroform. First Δ-(*R*) conformers are listed, then Δ-(*R*) conformers, with relative energies < 7.25 kcal/mol from the absolute minimum.

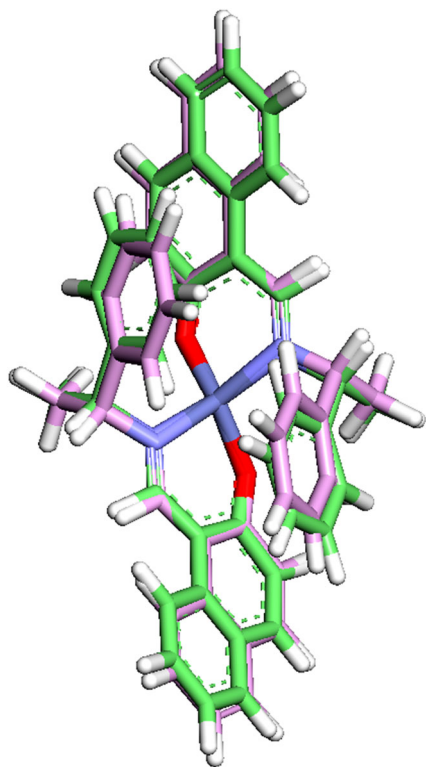

**Figure S9.** Molecular overlay between the X-ray structure of (*R*)-**1** (green) and the lowest-energy DFT-optimized structure (pink). Calculations run at B3LYP-D3/def2-TZVP level with PCM for chloroform.



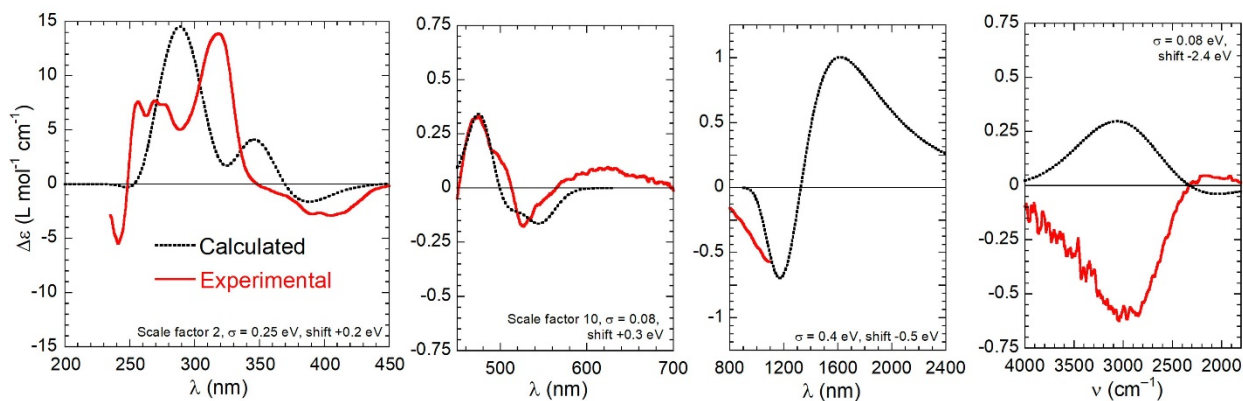

**Figure S10.** Comparison between experimental (red lines) and calculated (black dotted lines) CD superspectra of (R)-1. Calculations run at the B3LYP/def2-TZVP//B3LYP-D3/def2-TZVP level with PCM for chloroform, as Boltzmann averages over two  $\Lambda$  conformers. The parameters used to generate the calculated spectra in each region are given as insets.

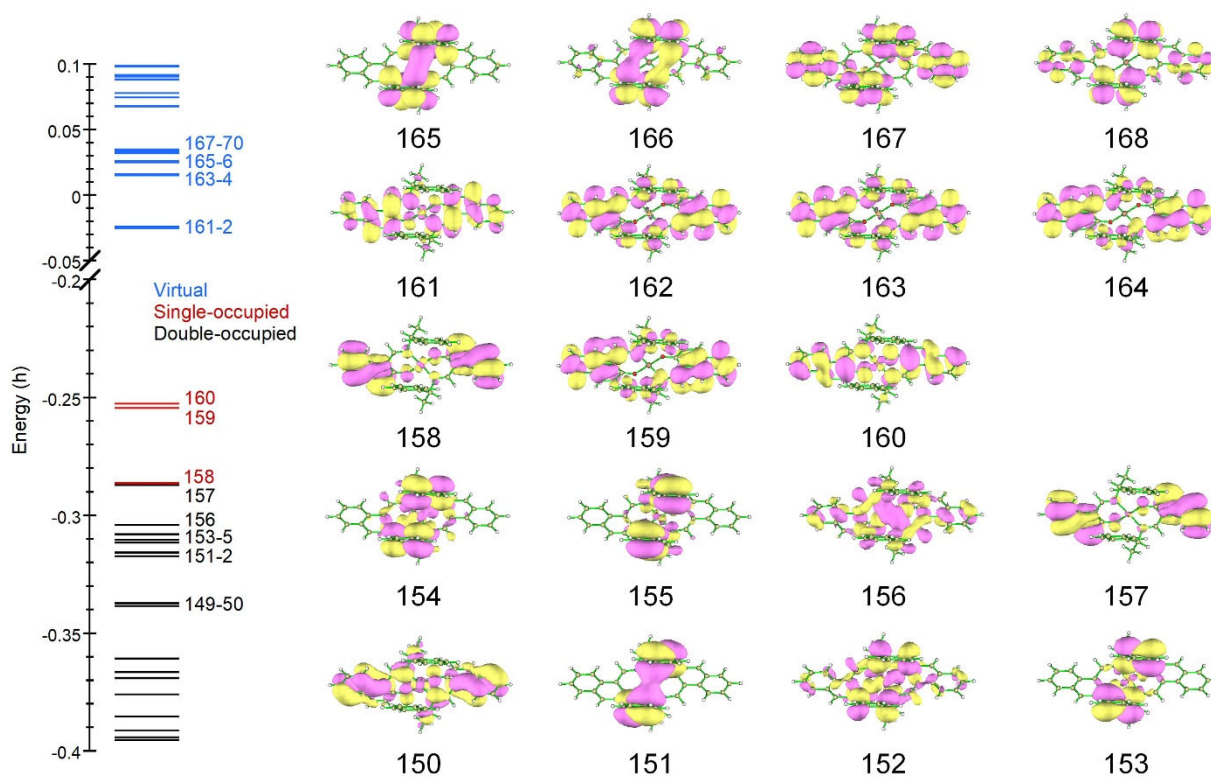

**Figure S11.** Frontier Kohn-Sham molecular orbitals (MO) and energies calculated at the CAM-B3LYP/ def2-TZVP//B3LYP-D3/ def2-TZVP level for  $C_2$ -symmetric structure of (*R*)-**1**. Plotted with MultiWfn v3.4;<sup>9</sup> isovalue 0.02.

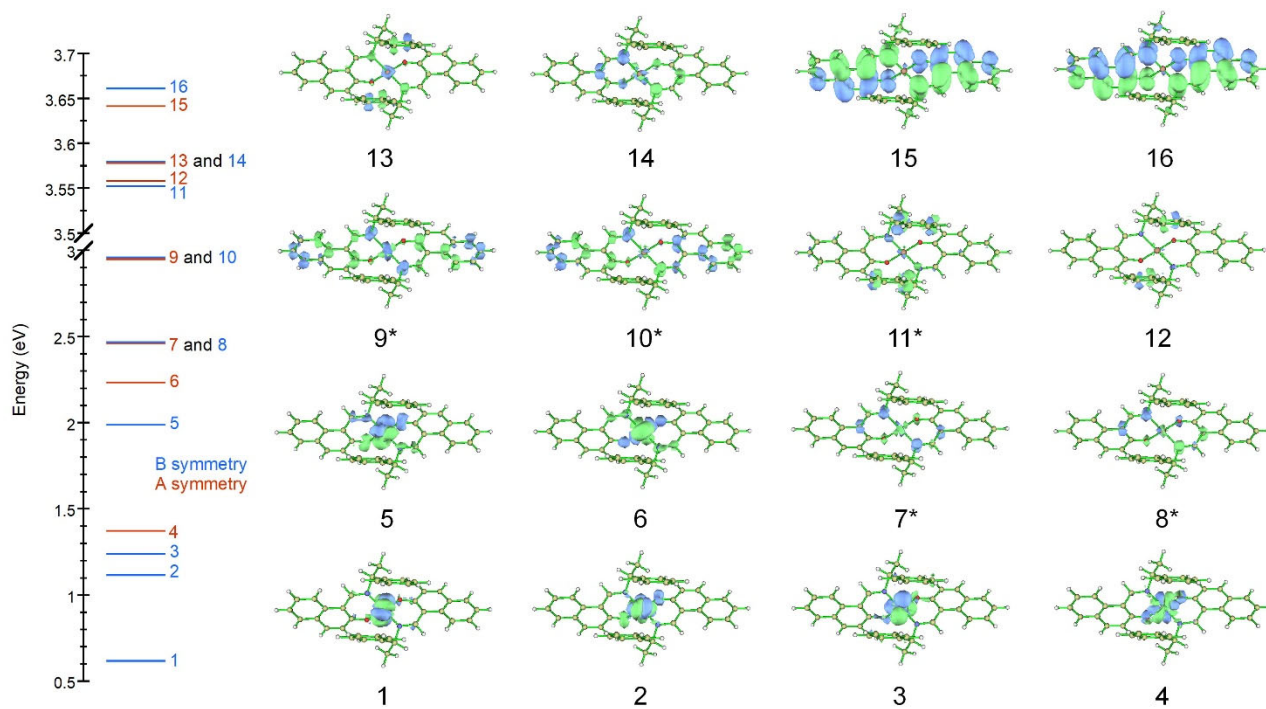

**Figure S12.** Transition energies, symmetries and density plots calculated at the CAM-B3LYP/def2-TZVP//B3LYP-D3/ def2-TZVP level for  $C_2$ -symmetric structure of (*R*)-1. Plotted with MultiWfn v3.4;<sup>9</sup> isovalue 0.001 or 0.0005 (\*).

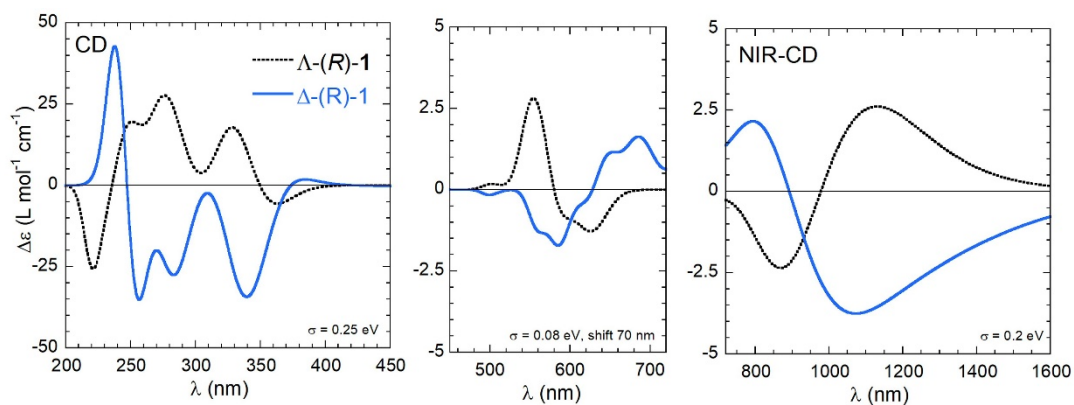

**Figure S13.** Comparison of ECD spectra calculated at the CAM-B3LYP/def2-TZVP level with PCM for chloroform, as Boltzmann average on the two lowest-energy  $\Lambda$ -(*R*)-**1** conformers, and on the four lowest energy  $\Delta$ -(*R*)-**1** conformers (see Figure S8). Geometries optimized at B3LYP/def2-SVP level and populations estimated at B3LYP-D3/def2-TZVP level with PCM for chloroform.

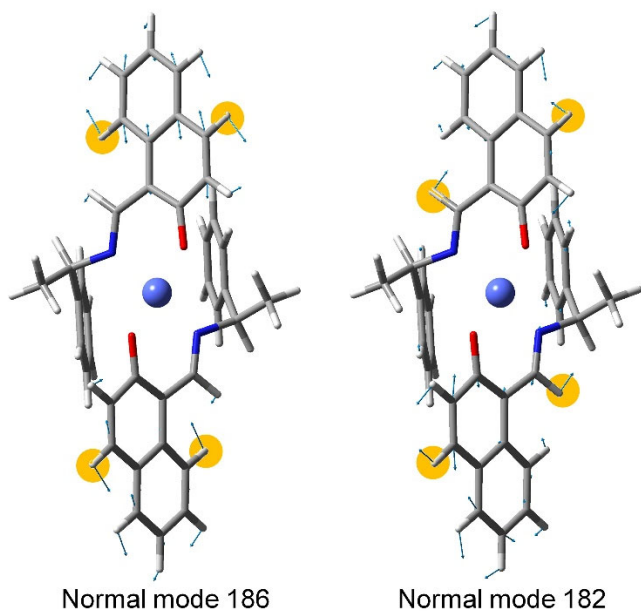

**Figure S14.** Atom displacements (light blue arrows) for B-symmetry normal modes 182 and 186; the H atoms most contributing to the normal modes are highlighted.

## References for the Supporting Information

1. Flack, H. On enantiomorph-polarity estimation. *Acta Cryst. A* **1983**, *39*, 876-881.
2. Flack, H. D.; Bernardinelli, G. Absolute structure and absolute configuration. *Acta Cryst. A* **1999**, *55*, 908-915.
3. Flack, H. D.; Bernardinelli, G. The use of X-ray crystallography to determine absolute configuration. *Chirality* **2008**, *20*, 681-690.
4. Flack, H. D.; Sadki, M.; Thompson, A. L.; Watkin, D. J. Practical applications of averages and differences of Friedel opposites. *Acta Cryst. A* **2011**, *67*, 21-34.
5. Pescitelli, G.; Lüdeke, S.; Chamayou, A. C.; Marolt, M.; Justus, V.; Gorecki, M.; Arrico, L.; Di Bari, L.; Islam, M. A.; Gruber, I.; Enamullah, M.; Janiak, C. Broad-Range Spectral Analysis for Chiral Metal Coordination Compounds: (Chiro)optical Superspectrum of Cobalt(II) Complexes. *Inorg. Chem.* **2018**, *57*, 13397-13408.
6. Enamullah, M.; Vasylyeva, V.; Janiak, C. Chirality and diastereoselection of  $\Delta/\Lambda$ -configured tetrahedral zinc(II) complexes with enantiopure or racemic Schiff base ligands. *Inorg. Chim. Acta* **2013**, *408*, 109-119.
7. Chamayou, A. C.; Makhloufi, G.; Nafie, L. A.; Janiak, C.; Lüdeke, S. Solvation-Induced Helicity Inversion of Pseudotetrahedral Chiral Copper(II) Complexes. *Inorg. Chem.* **2015**, *54*, 2193-2203.
8. Enamullah, M.; Quddus, M. A.; Hasan, M. R.; Pescitelli, G.; Berardozi, R.; Reiss, G. J.; Janiak, C. Syntheses, Spectroscopy, and Structural Analyses of Dinuclear Chiral-at-Metal -Aqua-tetrakis (R or S)-N-1-(Ar)ethylsalicylaldiminato di- $\Lambda$ - or - $\Delta$ -nickel(II) Complexes. *Eur. J. Inorg. Chem.* **2015**, 2758-2768.
9. Lu, T.; Chen, F. Multiwfn: A multifunctional wavefunction analyzer. *J. Comput. Chem.* **2012**, *33*, 580-592.
